# Supplementary material for: High-quality indium–gallium–zinc oxide films synthesized by atomic layer deposition using a single cocktail precursor based on a liquid-delivery system and their application in transistors and inverters
Source: Royal Society of Chemistry journal article supplement (doi:10.1039/d4tc01843e), 2024-01-01
Supplement: d4tc01843e1.pdf [file d4tc01843e1.pdf]

## Electronic Supplementary Information

# High-quality indium-gallium-zinc oxide films synthesized by atomic layer deposition using a single cocktail precursor based on a liquid-delivery system and their applications for transistors and inverters

Sang-Joon Park<sup>a</sup>, Se-Ryong Park<sup>a</sup>, Woo-Seok Jeon<sup>b</sup>, Jong Mu Na<sup>c</sup>, Jun Hyung Lim<sup>b</sup>, Sukhun Ham<sup>c</sup>, Yung-Bin Chung<sup>\*b</sup> and Tae-Jun Ha<sup>\*a</sup>

<sup>a</sup> *Department of Electronic Materials Engineering, Kwangwoon University, Seoul 01897, Republic of Korea*

<sup>b</sup> *Samsung Display Co., LTD., Gyeonggi-Do 17113, Republic of Korea*

<sup>c</sup> *Ji-Tech Co., Ltd., Jeollabuk-do 54002, Republic of Korea*

*\*Corresponding author E-mail address: [taejunha0604@gmail.com](mailto:taejunha0604@gmail.com), [yungbin.chung@samsung.com](mailto:yungbin.chung@samsung.com)*

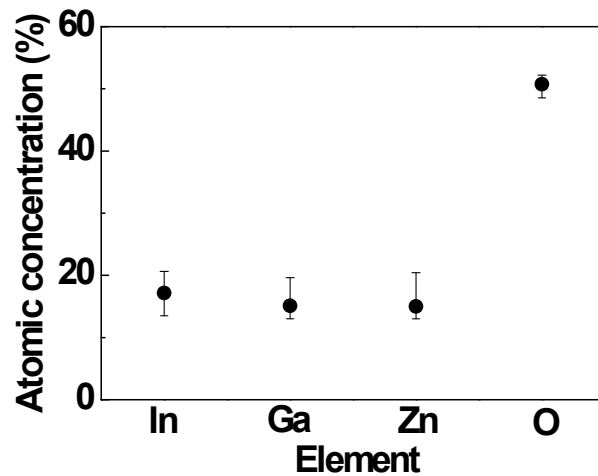

**Fig. S1** Atomic concentration of In, Ga, Zn, and O in 20 ALD-derived IGZO films, extracted from XPS spectra.

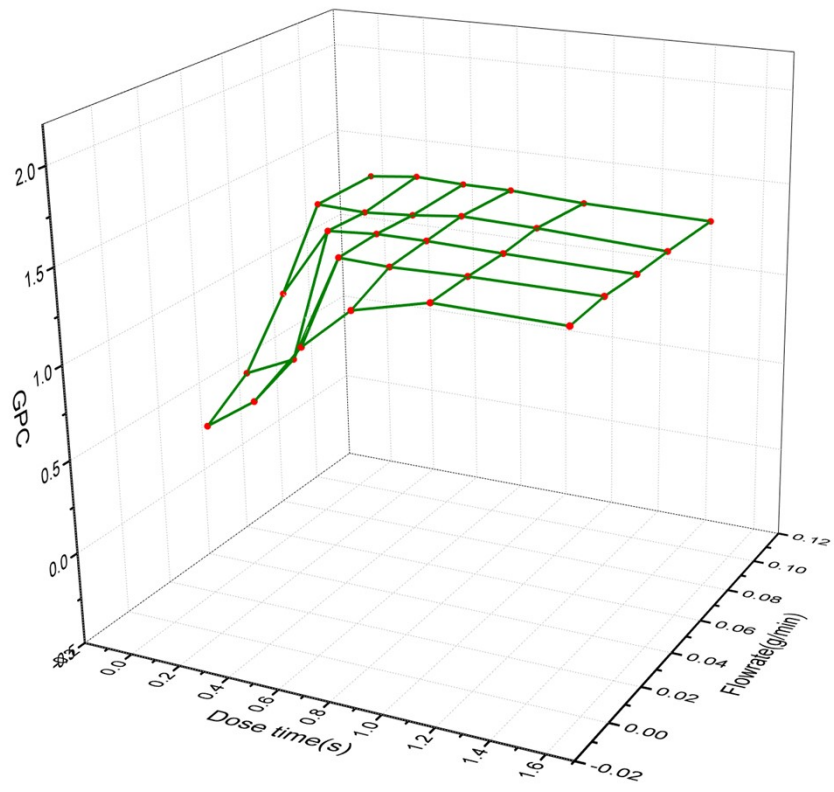

**Fig. S2.** GPC as a function of dose time and flow rate.

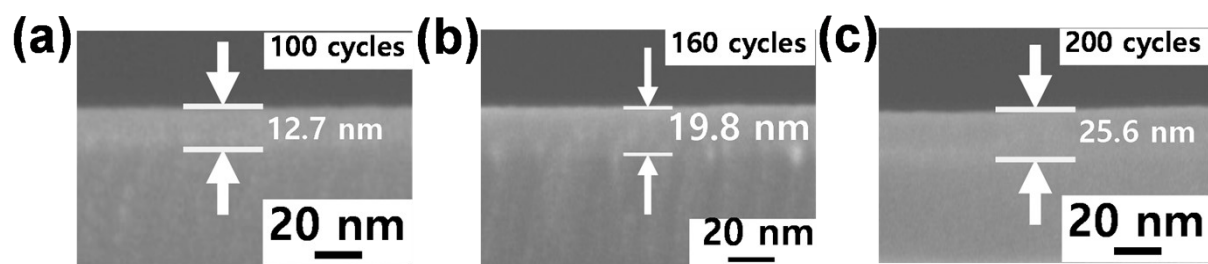

**Fig. S3.** Cross-sectional SEM images of the ALD-derived IGZO films synthesized with (a) 100, (b) 160, and (c) 200 deposition cycles.
